# Supplementary material for: Identification of three small nucleolar RNAs (snoRNAs) as potential prognostic markers in diffuse large B‐cell lymphoma
Source: PubMed Central journal article supplement (PMC9939161; doi:10.1002/cam4.5115), 2022-08-16

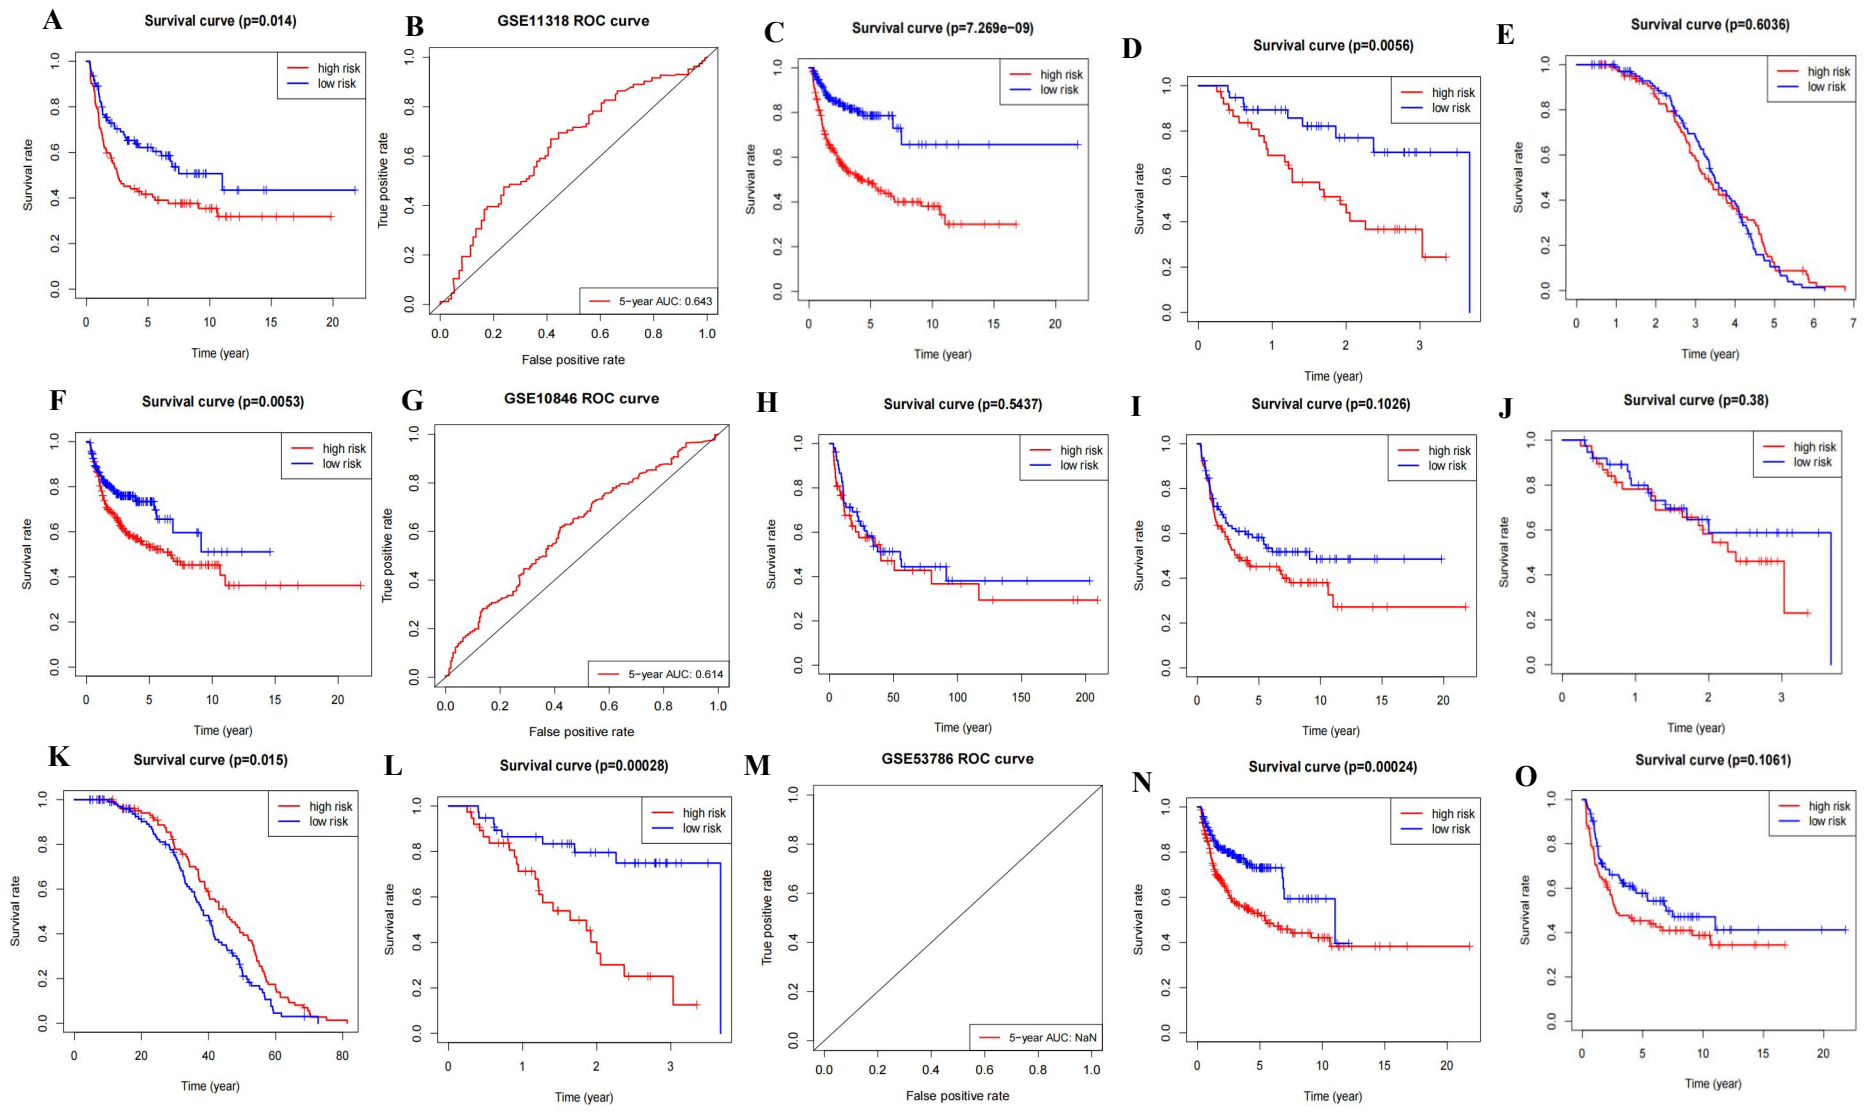

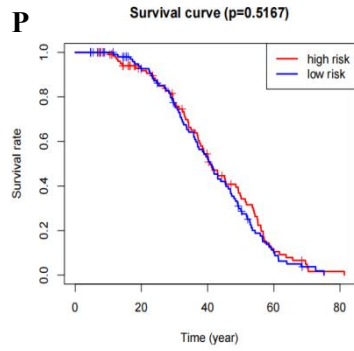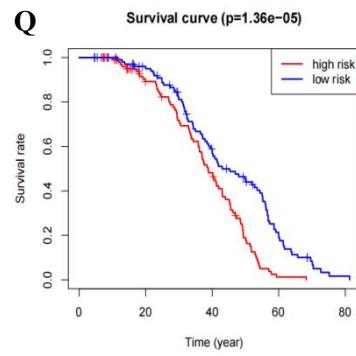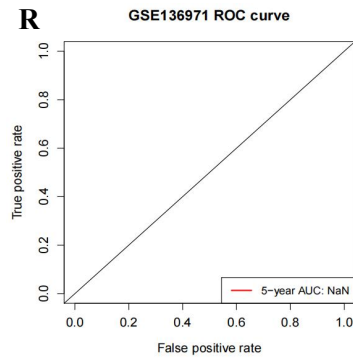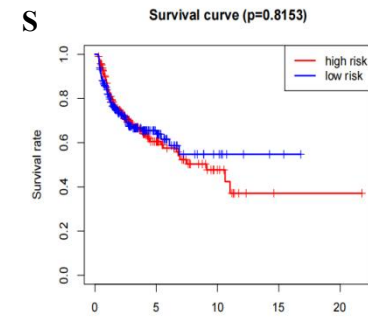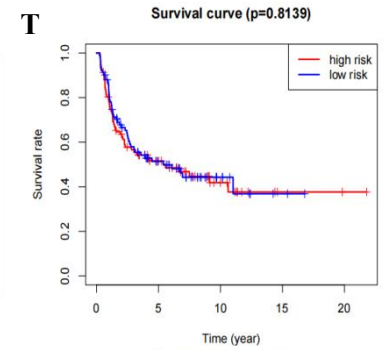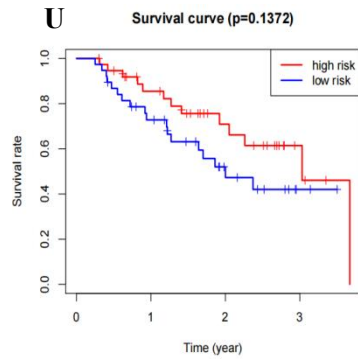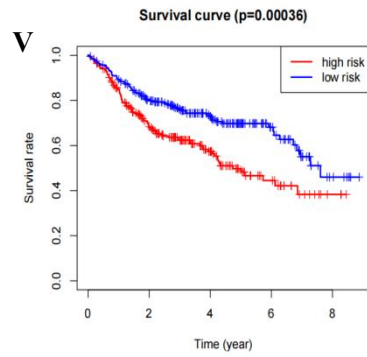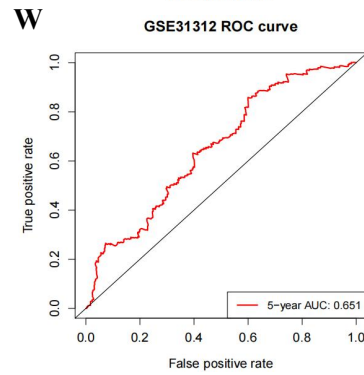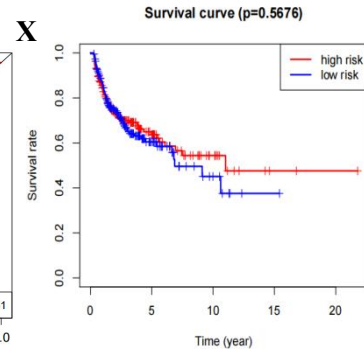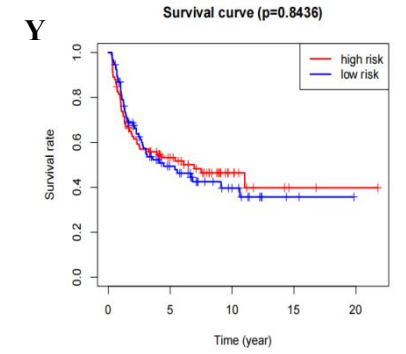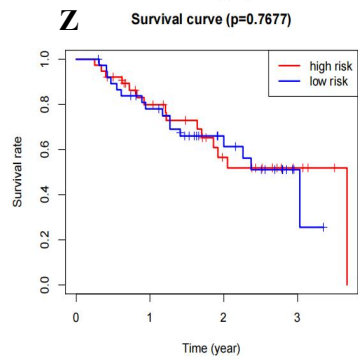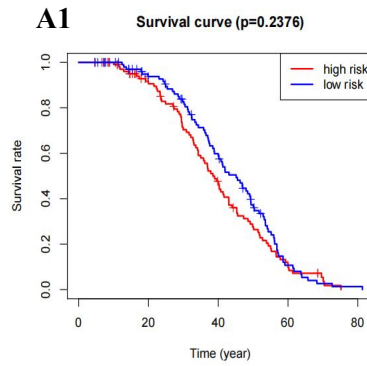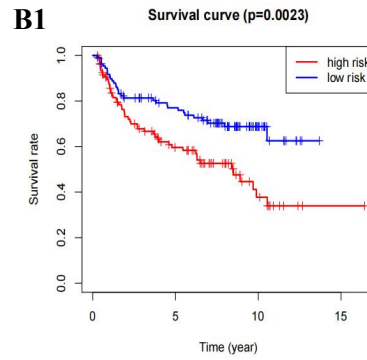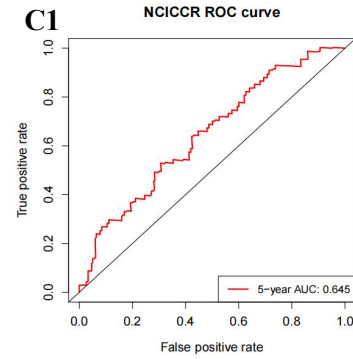

**A**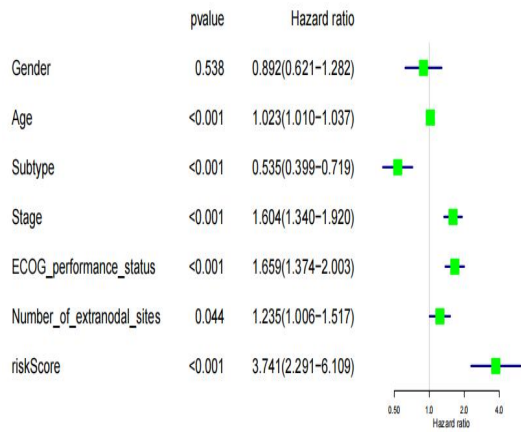**B**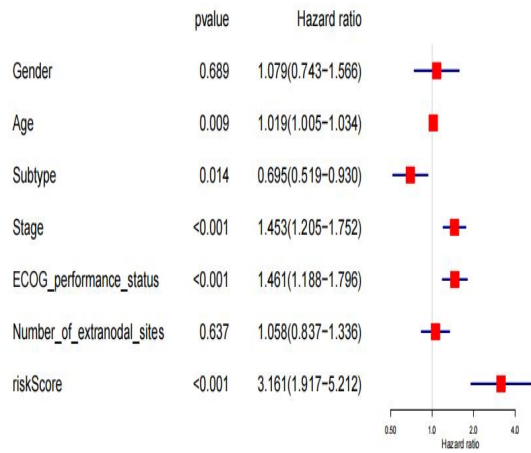**C**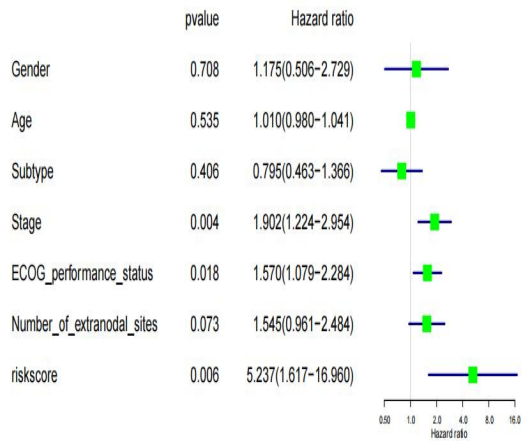**D**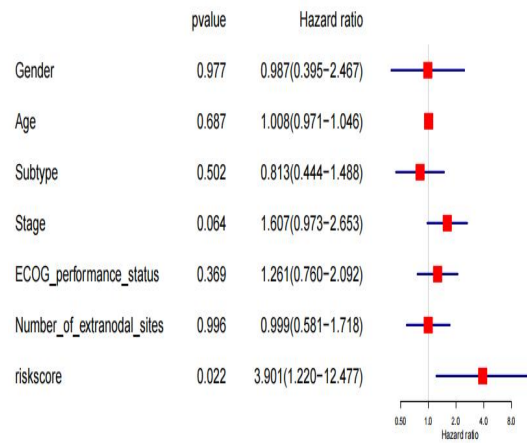

Supplement: CAM4-12-3812-s002.pdf [file CAM4-12-3812-s002.pdf]
